# Supplementary material for: Nb-doped NiO nanoflowers for nitrite electroreduction to ammonia
Source: PubMed Central journal article supplement (PMC10558769; doi:10.1016/j.isci.2023.107944), 2023-09-19
Supplement: mmc1.pdf [file mmc1.pdf]

**iScience, Volume 26**

**Supplemental information**

**Nb-doped NiO nanoflowers for nitrite  
electroreduction to ammonia**

**Ying Zhang, Yuying Wan, Xiaoxu Liu, Kai Chen, and Ke Chu**

### Calculation details

Cambridge sequential total energy package (CASTEP) module was applied for the density functional theory (DFT) calculations. The exchange–correlation function was utilized by Perdew–Burke–Ernzerhof (PBE) generalized gradient approximation (GGA) functional. The convergence criteria for structure optimization were chosen as (1) energy tolerance of  $5 \times 10^{-5}$  eV, (2) maximum force tolerance of  $0.1 \text{ eV } \text{\AA}^{-1}$  and (3) Monkhorst–Pack k–point sampling of  $2 \times 2 \times 2$ . The electron wave functions were expanded using plane waves with a cutoff energy of 400 eV. The NiO (200) slab was modeled by a  $2 \times 2$  supercell, and a vacuum region of 15 Å was used to separate adjacent slabs. The Gibbs free energy ( $\Delta G$ , 298 K) of reaction steps is calculated by:

$$\Delta G = \Delta E + \Delta ZPE - T\Delta S \quad (\text{S1})$$

where  $\Delta E$  is the adsorption energy,  $\Delta ZPE$  is the zero-point energy difference and  $T\Delta S$  is the entropy difference between the gas phase and adsorbed state. The entropies of free gases were acquired from the NIST database.

Molecular dynamics (MD) simulations were carried out using a force field type of universal. the electrolyte system was set up by randomly placing 1 000 H<sub>2</sub>O, 50 NO<sub>2</sub> and 50 H molecules in the simulation box, with a catalyst model fixed perpendicular to the z–axis at the center of the simulation system. The electrolyte system was geometrically optimized by setting the convergence tolerance of  $2.0 \times 10^{-5}$  kcal/mol for energy and 0.001 kcal/mol/Å for force. The non–bond interaction was processed by Ewald method with accuracy of  $1.0 \times 10^{-5}$  Kcal/mol. After geometry optimization, the MD simulations were performed in an NVT ensemble (298 K) with the total simulation time of 1 ns at a time step of 0.2 fs. The radial distribution function (RDF) is calculated as

$$g(r) = \frac{dN}{4\pi\rho^2 dr} \quad (\text{S2})$$

where  $dN$  is the amount of \*NO<sub>2</sub>/\*H in the shell between the central particle  $r$  and  $r+dr$ ,  $\rho$  is the number density of \*NO<sub>2</sub>/\*H.

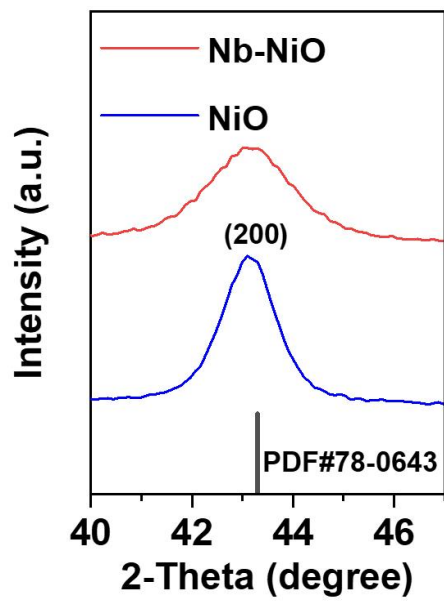

Fig. S1. Enlarged view for the XRD patterns of NiO and Nb-NiO.

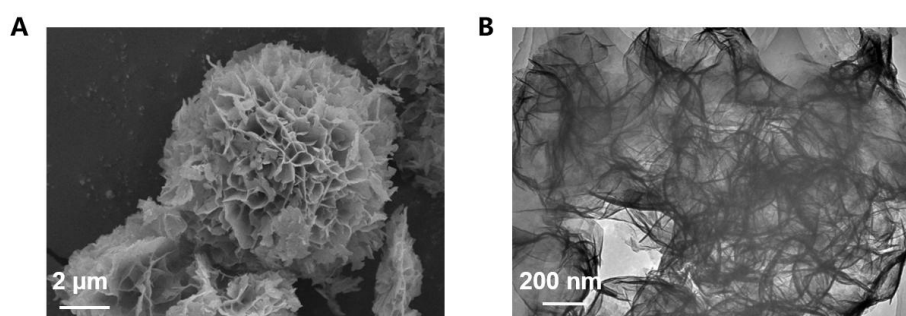

Fig. S2. Morphology of pristine NiO: (A) TEM image. (B) HRTEM image.

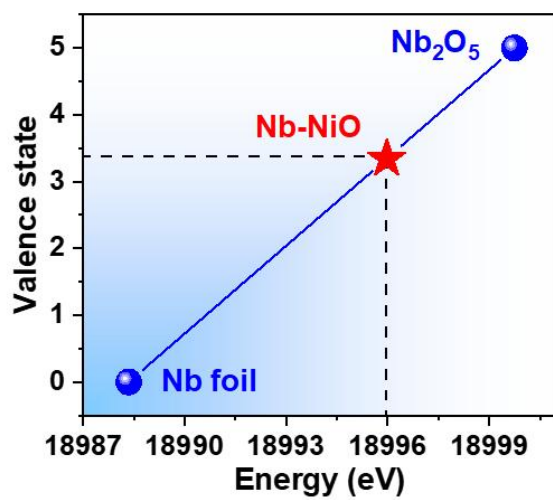

Fig. S3. XANES fitted average Nb valence state of Nb-NiO.

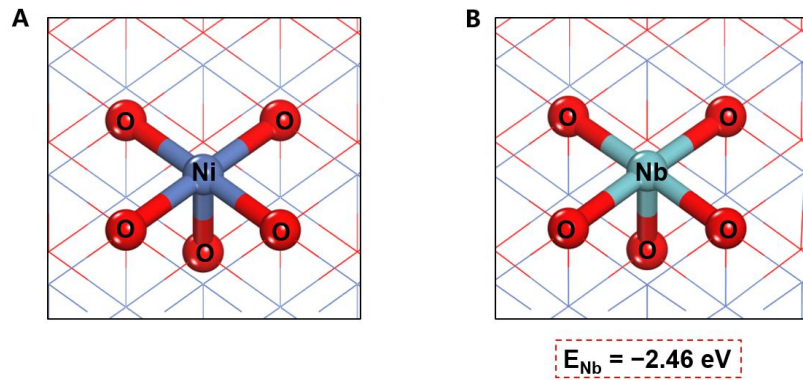

Fig S4. (A) Pristine NiO structure and (B) the formation energy of Nb-NiO.

**Discussion:**

The formation energy of Nb-NiO is calculated as<sup>1</sup>:

$$E = E(\text{Nb-NiO}) - E(\text{NiO}) - \mu_{\text{Nb}} + \mu_{\text{Ni}}$$

where  $E$  is the total energies of corresponding structures,  $\mu$  is the chemical potential of corresponding atoms.

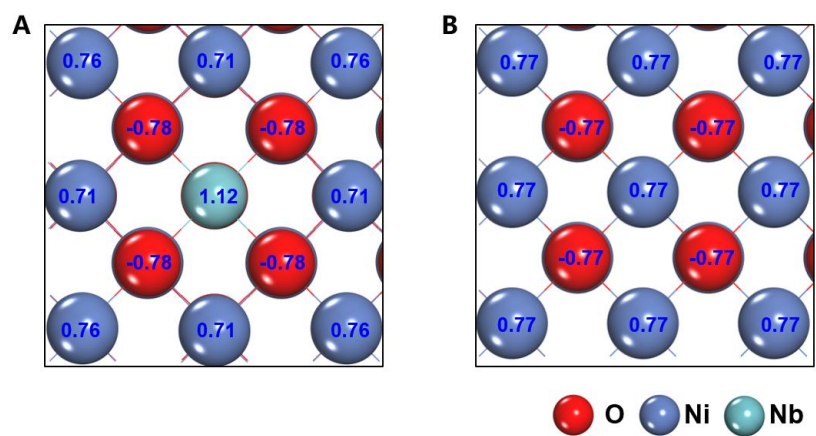

Fig. S5. Detailed charge analysis of (A) Nb-NiO and (B) NiO.

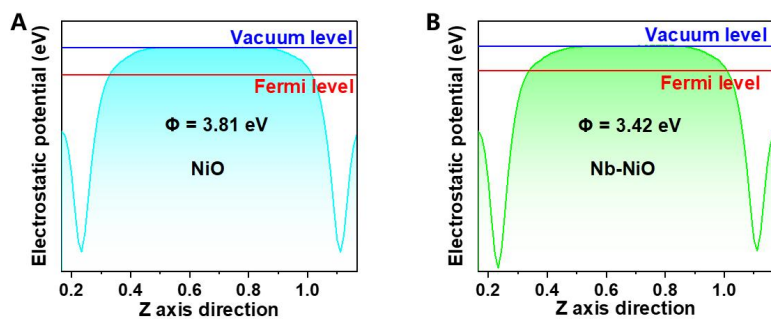

Fig. S6. Average potential profiles along c-axis direction for calculating the work functions of (A) NiO and (B) Nb-NiO.



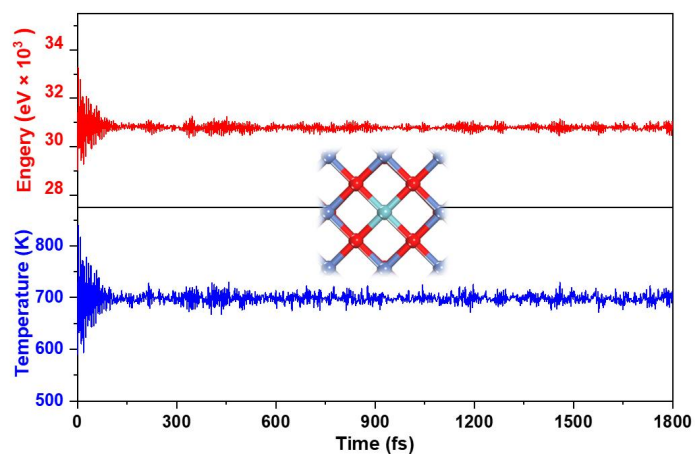

Fig. S7. Variations of energy and temperature at different AIMD simulation times (Inset is the geometric structure of Nb–NiO after 1800 fs of AIMD simulation at 700 K).

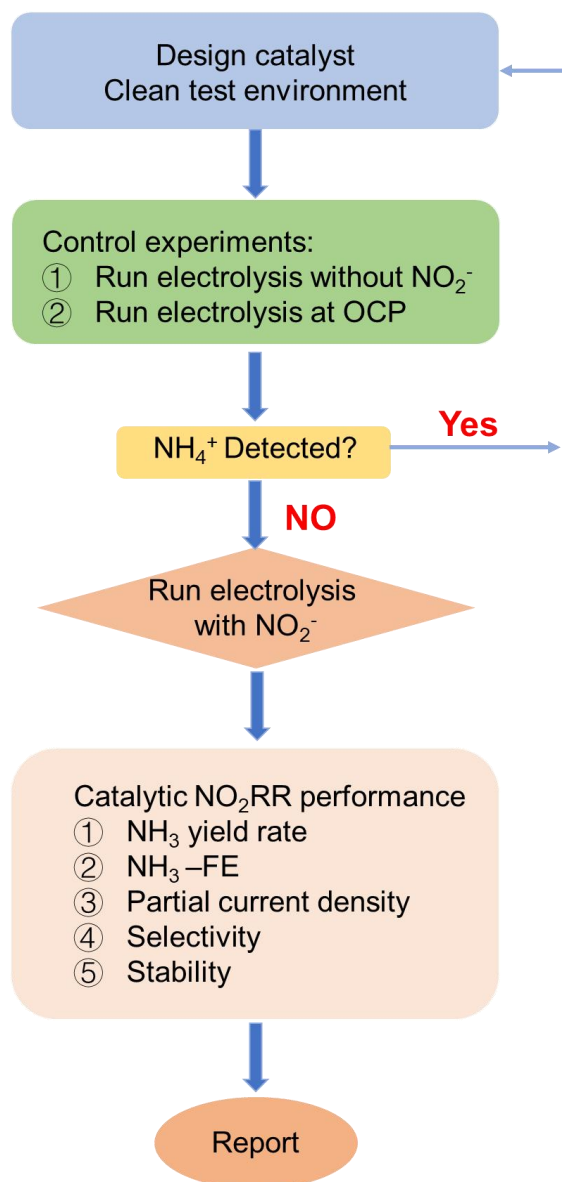

Fig. S8. Flow chart of the electrocatalytic NO<sub>2</sub>RR measurement procedure.

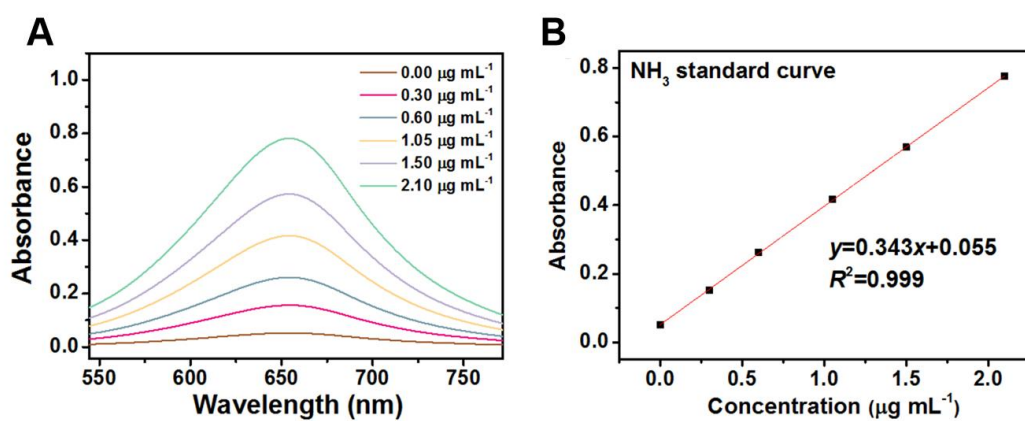

Fig S9. (A) UV-vis absorption spectra of  $\text{NH}_4^+$  assays after incubated for 2 h at ambient conditions. (B) Calibration curve used for the calculation of  $\text{NH}_3$  concentrations.

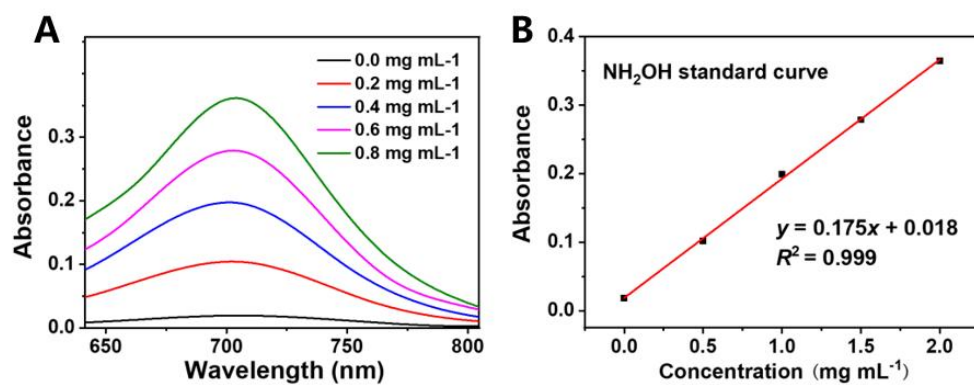

Fig. S10. (A) UV-vis absorption spectra of cooled  $\text{NH}_2\text{OH}$  assays. (B) Calibration curve used for the calculation of  $\text{NH}_2\text{OH}$  concentrations.

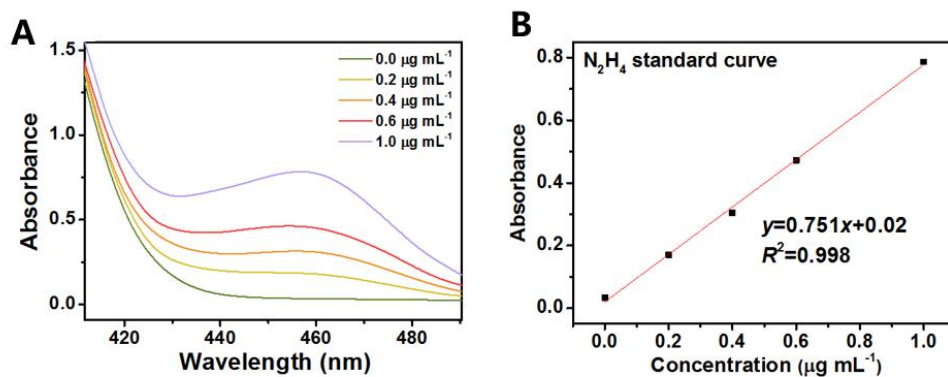

Fig. S11. (A) UV-vis absorption spectra of  $N_2H_4$  assays after incubated for 20 min at ambient conditions. (B) Calibration curve used for calculation of  $N_2H_4$  concentrations.

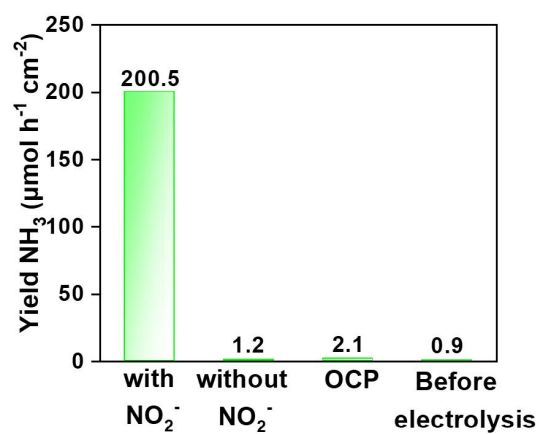

Fig. S12. Amounts of produced NH<sub>3</sub> on Nb-NiO under different conditions: (1) electrolysis in NO<sub>2</sub><sup>-</sup>-containing solution at -0.6 V, (2) electrolysis in NO<sub>2</sub><sup>-</sup>-free solution at -0.6 V, (3) electrolysis in NO<sub>2</sub><sup>-</sup>-containing solution at open-circuit potential (OCP), (4) before electrolysis.

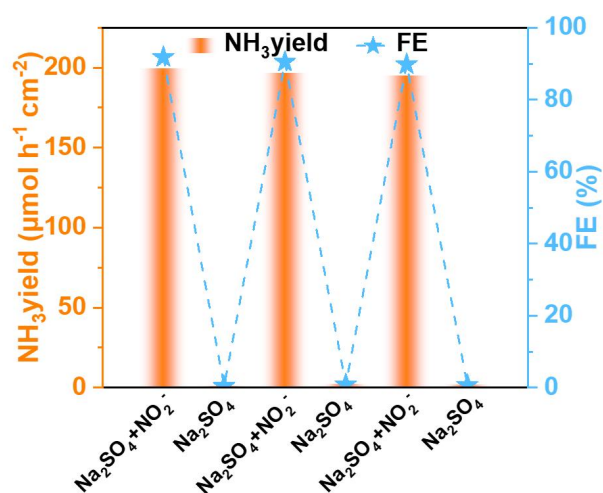

Fig. S13. Alternating experiments with and without NO<sub>2</sub><sup>-</sup>.

**Discussion:**

The alternating cycling tests (Fig. S13) show that the NH<sub>3</sub> production is prominent during the NO<sub>2</sub><sup>-</sup>-containing cycles, while the NO<sub>2</sub><sup>-</sup>-free cycles show negligible NH<sub>3</sub> generation, thus confirming that the produced NH<sub>3</sub> is derived from the NO<sub>2</sub>RR electrolysis on Nb-NiO.

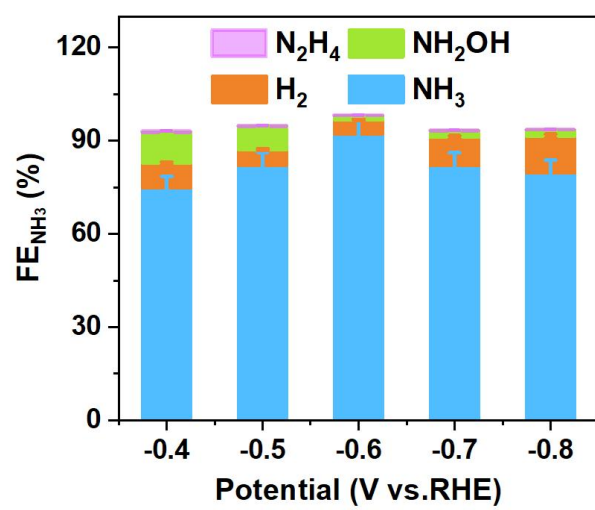

Fig S14. FEs of different products at various potentials after 0.5 h electrolysis.



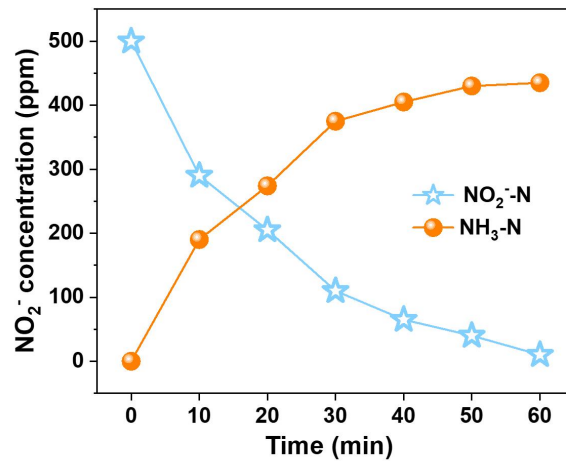

Fig. R15. The variations of  $\text{NO}_2^-$ -N and  $\text{NH}_3$ -N concentrations with  $\text{NO}_2\text{RR}$  electrolysis time on Nb-NiO at  $-0.6$  V.

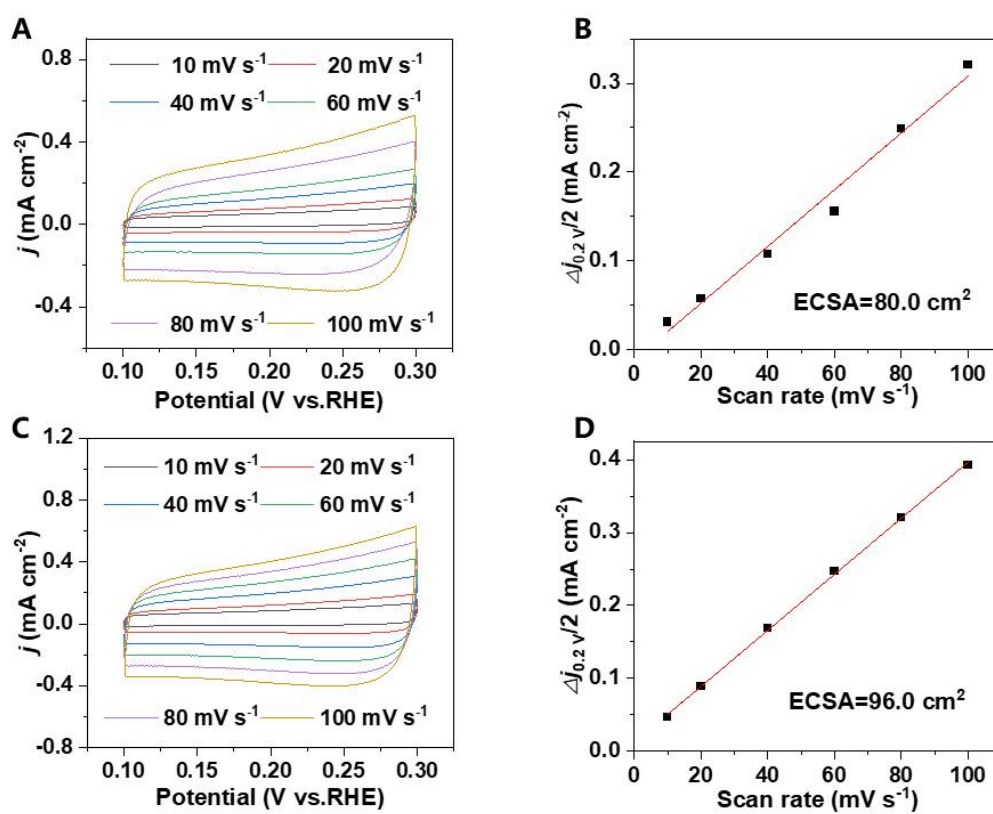

Fig. S16. CV measurements at different scanning rates and calculated ECSA for (A, B) NiO and (C, D) Nb-NiO.

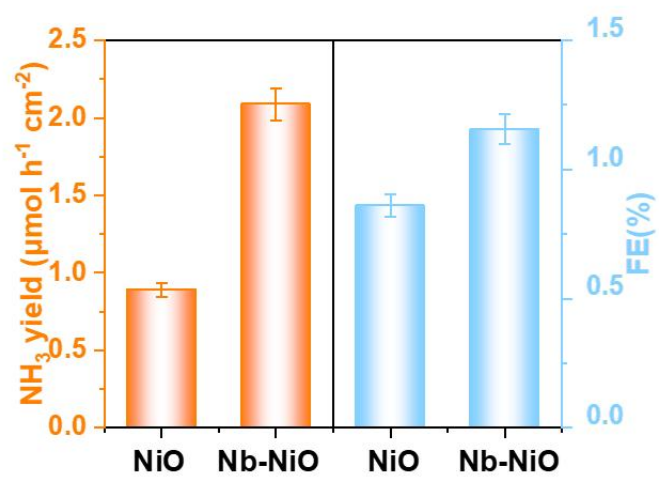

Fig. S17. Comparison of the ECSA-normalized NH<sub>3</sub> yield rates and FE<sub>NH<sub>3</sub></sub> between Nb-NiO and NiO at -0.6 V.

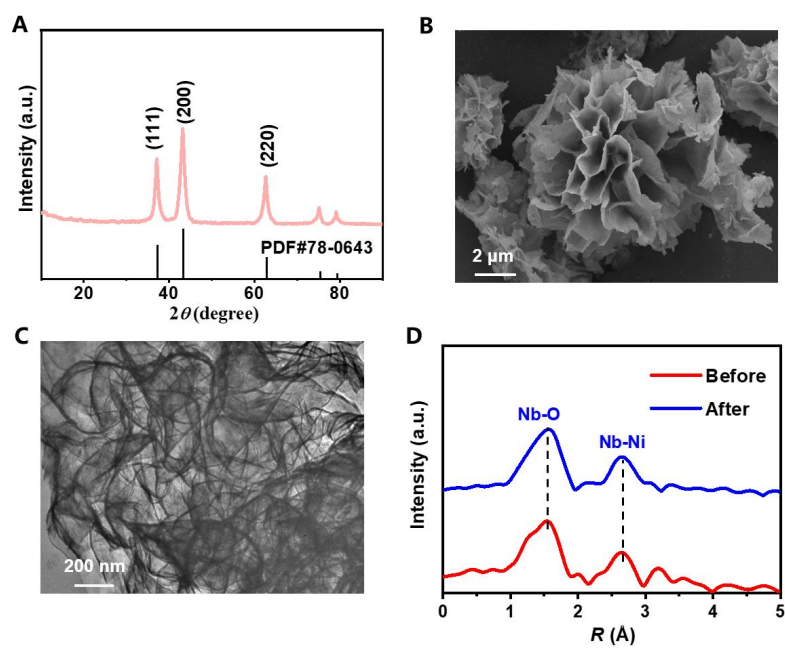

Fig. S18. Characterizations of Nb-NiO after electrolysis: (A) XRD pattern, (B) SEM image and (C) TEM image. (D) Nb K-edge EXAFS spectra of Nb-NiO before and after stability tests.

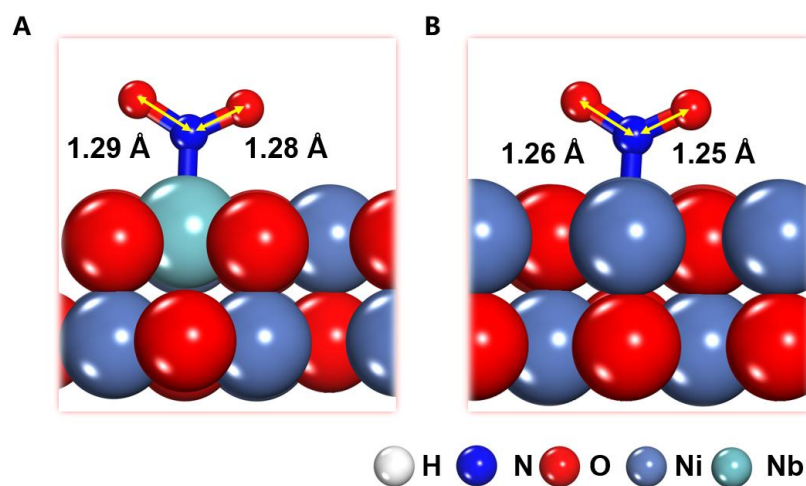

Fig. S19. The optimized structures of  $\text{NO}_2^-$  adsorption on (A) Nb-NiO and (B) NiO.

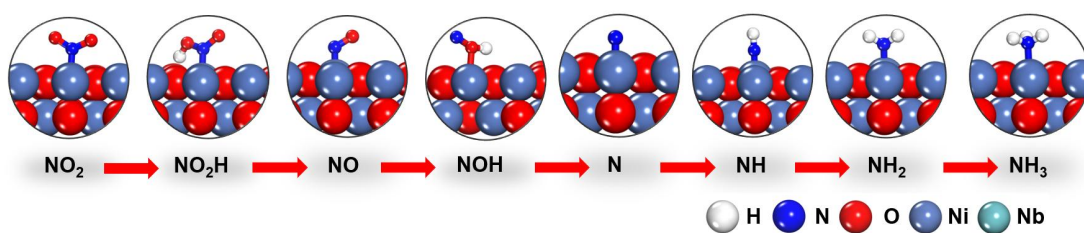

Fig. S20. The optimized atomic structures of the reaction intermediates on NiO.

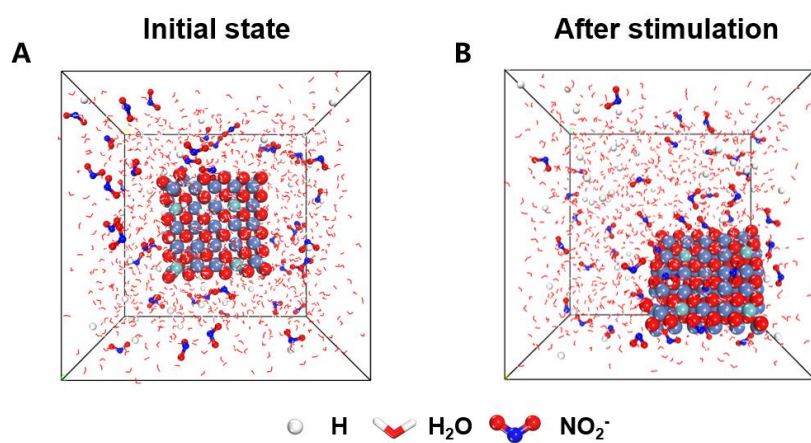

Fig. S21. (A) Initial and (B) simulated states of the dynamic process of NO<sub>2</sub><sup>-</sup> and H adsorption on Nb-NiO.

Table S1 Nb K-edge EXAFS fitting results of Nb-NiO.

| Sample | Shell | CN  | R (Å) | $\sigma^2$<br>( $10^{-3}\text{Å}^2$ ) | $\Delta E_0$ (eV) | R factor |
|--------|-------|-----|-------|---------------------------------------|-------------------|----------|
| Nb/NiO | Nb-Ni | 8.2 | 3.15  | 7.2                                   | -6.1              | 0.015    |
|        | Nb-O  | 5.3 | 2.04  | 4.8                                   | 1.9               |          |
|        | Nb-O  | 0.6 | 1.91  | 2.6                                   | -3.5              |          |

CN is the coordination number, R is interatomic distance,  $\sigma^2$  is Debye-Waller factor,  $\Delta E_0$  is edge-energy shift, R factor is used to value the goodness of the fitting.



Table 2 Comparison of the optimum NH<sub>3</sub> yield rate and FE<sub>NH<sub>3</sub></sub> for the recently reported state-of-the-art NO<sub>2</sub>RR electrocatalysts at ambient conditions.

| Catalyst                               | Electrolyte                                                                            | NH <sub>3</sub> yield rate<br>( $\mu\text{mol h}^{-1} \text{cm}^{-2}$<br>@ V vs. RHE) | FE <sub>NH<sub>3</sub></sub><br>(@ V vs. RHE) | Ref.                 |
|----------------------------------------|----------------------------------------------------------------------------------------|---------------------------------------------------------------------------------------|-----------------------------------------------|----------------------|
| TiO <sub>2-x</sub> /TP                 | (0.1 M NO <sub>2</sub> <sup>-</sup> )                                                  | 464.6@ -0.7                                                                           | 92.7% @ -0.7                                  | 2                    |
| V-TiO <sub>2</sub> /TP                 | 0.1 M NaOH<br>(0.1 M NO <sub>2</sub> <sup>-</sup> )                                    | 540.8@ -0.7                                                                           | 93.2%@ -0.6                                   | 3                    |
| Ni-NSA-V <sub>Ni</sub>                 | 0.1 M NaOH<br>(200 ppm NO <sub>2</sub> <sup>-</sup> )                                  | 135.5@ -0.54                                                                          | 88.9%@ -0.54                                  | 4                    |
| Ni <sub>2</sub> P/NF                   | 0.1 M NaOH<br>(200 ppm NO <sub>2</sub> <sup>-</sup> )                                  | 158.1@ -0.3                                                                           | 90.2%@ -0.3                                   | 5                    |
| Cu <sub>3</sub> P<br>Nanowire array    | 0.1 M PBS<br>(0.1 M NO <sub>2</sub> <sup>-</sup> )                                     | 95.7@ -0.5                                                                            | 91.2%@ -0.5                                   | 6                    |
| CoP<br>nanoarray                       | 0.1 M PBS<br>(500 ppm NO <sub>2</sub> <sup>-</sup> )                                   | 133.0@ -0.2                                                                           | 90.2%@ -0.2                                   | 7                    |
| [Co(DIM)Br <sub>2</sub> ] <sup>+</sup> | 0.1 M NaNO <sub>2</sub>                                                                | /                                                                                     | 88.0%                                         | 8                    |
| Cu <sub>80</sub> Ni <sub>20</sub>      | 0.1 M NaOH<br>(20 mM NO <sub>2</sub> <sup>-</sup> )                                    | /                                                                                     | 87.6%@ -0.335                                 | 9                    |
| Co tripeptide<br>complex               | 0.1 M MOPS<br>(0.1 M NO <sub>2</sub> <sup>-</sup> )                                    | 1.1@ -0.29                                                                            | 90%@ -0.29                                    | 10                   |
| MnO <sub>2</sub><br>nanoarrays         | 0.1 M Na <sub>2</sub> SO <sub>4</sub><br>(0.2 M NO <sub>2</sub> <sup>-</sup> )         | 0.11@ -0.885                                                                          | 6%@ -0.885                                    | 11                   |
| <b>Nb/NiO</b>                          | <b>0.5 M Na<sub>2</sub>SO<sub>4</sub></b><br><b>(0.1 M NO<sub>2</sub><sup>-</sup>)</b> | <b>200.6@ -0.6</b>                                                                    | <b>92.4%@ -0.6</b>                            | <b>This<br/>Work</b> |

## References

1. Chu, K., Wang, J., Liu, Y.-p., Li, Q.-q., and Guo, Y.-l. (2020). Mo-doped SnS<sub>2</sub> with enriched S-vacancies for highly efficient electrocatalytic N<sub>2</sub> reduction: the critical role of the Mo–Sn–Sn trimer. *J. Mater. Chem. A* **8**, 7117-7124. 10.1039/D0TA01688H.
2. Zhao, D., Liang, J., Li, J., Zhang, L., Dong, K., Yue, L., Luo, Y., Ren, Y., Liu, Q., Hamdy, M.S., et al. (2022). A TiO<sub>2-x</sub> nanobelt array with oxygen vacancies: an efficient electrocatalyst toward nitrite conversion to ammonia. *Chem. Commun.* **58**, 3669-3672.
3. Wang, H., Zhang, F., Jin, M., Zhao, D., Fan, X., Li, Z., Luo, Y., Zheng, D., Li, T., Wang, Y., et al. (2023). V-doped TiO<sub>2</sub> nanobelt array for high-efficiency electrocatalytic nitrite reduction to ammonia. *Mater. Today Phys.* **30**, 100944.
4. Wang, C., Zhou, W., Sun, Z., Wang, Y., Zhang, B., and Yu, Y. (2021). Integrated selective nitrite reduction to ammonia with tetrahydroisoquinoline semi-dehydrogenation over a vacancy-rich Ni bifunctional electrode. *J. Mater. Chem. A* **9**, 239-243.
5. Wen, G., Liang, J., Zhang, L., Li, T., Liu, Q., An, X., Shi, X., Liu, Y., Gao, S., Asiri, A.M., et al. (2022). Ni<sub>2</sub>P nanosheet array for high-efficiency electrohydrogenation of nitrite to ammonia at ambient conditions. *J. Colloid Interface Sci.* **606**, 1055-1063.
6. Liang, J., Deng, B., Liu, Q., Wen, G., Liu, Q., Li, T., Luo, Y., Alshehri, A.A., Alzahrani, K.A., Ma, D., and Sun, X. (2021). High-efficiency electrochemical nitrite reduction to ammonium using a Cu<sub>3</sub>P nanowire array under ambient conditions. *Green Chem.* **23**, 5487-5493.
7. Wen, G., Liang, J., Liu, Q., Li, T., An, X., Zhang, F., Alshehri, A.A., Alzahrani, K.A., Luo, Y., Kong, Q., and Sun, X. (2022). Ambient ammonia production via electrocatalytic nitrite reduction catalyzed by a CoP nanoarray. *Nano Res.* **15**, 972-977.
8. Xu, S., Kwon, H.-Y., Ashley, D.C., Chen, C.-H., Jakubikova, E., and Smith, J.M. (2019). Intramolecular hydrogen bonding facilitates electrocatalytic reduction of Nitrite in aqueous solutions. *Inorg. Chem.* **58**, 9443-9451.
9. Mattarozzi, L., Cattarin, S., Comisso, N., Guerriero, P., Musiani, M., Vázquez-Gómez, L., and Verlató, E. (2013). Electrochemical reduction of nitrate and nitrite in alkaline media at CuNi alloy electrodes. *Electrochim. Acta* **89**, 488-496.
10. Guo, Y., Stroka, J.R., Kandemir, B., Dickerson, C.E., and Bren, K.L. (2018). Cobalt metalloprotein electrocatalyst for the selective reduction of Nitrite to Ammonium. *J. Am. Chem. Soc.* **140**, 16888-16892.
11. Wang, R., Wang, Z., Xiang, X., Zhang, R., Shi, X., and Sun, X. (2018). MnO<sub>2</sub> nanoarrays: an efficient catalyst electrode for nitrite electroreduction toward sensing and NH<sub>3</sub> synthesis applications. *Chem. Commun.* **54**, 10340-10342.
